# Supplementary material for: Targeting the Bet-Hedging Strategy with an Inhibitor of Bacterial Efflux Capacity Enhances Antibiotic Efficiency and Ameliorates Bacterial Persistence In Vitro
Source: MDPI journal article supplement (doi:10.3390/microorganisms10101966), 2022-10-05
Supplement: s1 [file s1]

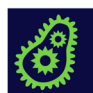

## Supplementary materials

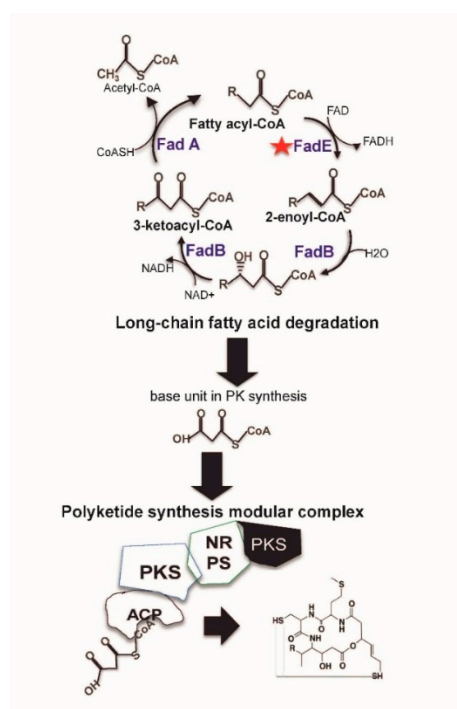

**Figure S1.** Schematic presentation showing long-chain fatty acids beta-oxidation pathway providing building block molecule to the PKS function. Malonyl-CoA, a product of the long-chain fatty acid degradation serves as a base unit in the polyketide (PK) synthesis [36]. The product of the PKS (BTH\_RS24270) function (burkholdac) has been first purified and categorized as inhibitor of mammalian histone deacetylase enzymes [28].
